# Supplementary material for: Natural language word embeddings as a glimpse into healthcare language and associated mortality surrounding end of life
Source: HighWire-hosted journal article supplement (doi:10.1136/bmjhci-2021-100464), 2021-10-01
Supplement: bmjhci-2021-100464supp002_data_supplement.pdf [file bmjhci-2021-100464supp002_data_supplement.pdf]

**Supplementary Table 1: All n-grams without filtering**

| <b>Seed Phrase:</b><br><b>"Ceiling of Treatment"</b> | <b>Alternative Seed Phrase:</b><br><b>"DNAR"</b> | <b>Alternative Seed Phrase:</b><br><b>"End of Life"</b> |
|------------------------------------------------------|--------------------------------------------------|---------------------------------------------------------|
| not for cpr                                          | not_for_resus                                    | 'eol_medications'                                       |
| ward based                                           | not_for_cpr                                      | 'end_of_life_care'                                      |
| ward based ceiling of care                           | dnacpr                                           | 'comfort_care'                                          |
| escalation of care                                   | ceiling_of_care                                  | 'eol_meds'                                              |
| not for itu                                          | dnar_and                                         | 'eolc'                                                  |
| not for escalation                                   | dnar                                             | 'not_for_cpr'                                           |
| escalation and                                       | ward_based_ceiling_of_care                       | 'palliative_medications'                                |
| not for intubation                                   | not_for_itu                                      | 'eol_care'                                              |
| ward based care only                                 | ward_based                                       | 'prn_eol'                                               |
| active ward                                          | dnacpr_and                                       | 'eolc_medications'                                      |
| not for resus                                        | not_for_escalation                               | 'active_ward'                                           |
| ceilings of care                                     | ceilings_of_care                                 | 'palliative_meds'                                       |
| not for resuscitation                                | not_for_resuscitation                            | 'ward_based_ceiling_of_care'                            |
| ceiling of care                                      | dnar_l1                                          | 'ward_based'                                            |
| based management                                     | ceiling_of_treatment                             | 'anticipatory_medications'                              |
| not for icu                                          | escalation_of_care                               | 'eol_prn'                                               |
| not for niv                                          | community_dnar                                   | 'not_for_itu'                                           |
| dnar and                                             | community_dnacpr                                 | 'anticipatory_meds'                                     |
| ceiling of treatment                                 | not_for_intubation                               | 'palliation'                                            |
| resuscitation as                                     | dnr                                              | 'palliative_input'                                      |
| cpr or                                               | eol                                              | 'ward_based_care_only'                                  |
| resuscitation                                        | and_dnar                                         | 'ward_base'                                             |
| palliation                                           | dnar_in                                          | 'palliative_referral'                                   |
| ward base                                            | ward_based_care_only                             | 'end_of_life_care_and'                                  |
| dnar not                                             | active_ward                                      | 'dnar_and'                                              |
| escalation beyond                                    | dnar_not                                         | 'ceiling_of_care'                                       |
| dnacpr                                               | escalation_and                                   | 'not_for_resus'                                         |

|                             |                       |                               |
|-----------------------------|-----------------------|-------------------------------|
| dnacpr and                  | dnacpr_in             | 'eol'                         |
| dnar                        | dnar_in_place         | 'actively_dying'              |
| brainstem testing           | ward_base             | 'palliation_and'              |
| withdrawal of intensive     | comfort_care          | 'not_for_escalation'          |
| withdrawal of treatment     | dna_cpr               | 'hospice_transfer'            |
| family discussion           | nfr                   | 'prn_eolc'                    |
| family discussions          | dnr_in                | 'hospice_bed'                 |
| futility                    | eol_care              | 'based_management'            |
| organ donation              | care_dnar             | 'palliative_care_input_and'   |
| brainstem death             | dnar_decision         | 'home_for_end_of_life_care'   |
| itu consultant              | not_for_niv           | 'plan_eol'                    |
| neurological prognosis      | ceilings_of_treatment | 'dnar_not'                    |
| stem testing                | dnar_signed           | 'not_for_intubation'          |
| discussions with the family | dnr_form              | 'palliative_review'           |
| unsurvivable                | dnar_with             | 'care_input'                  |
| candidate for itu           | dnar_l2               | 'palliative_care_input'       |
| resuscitation               | currently_for_full    | 'ongoing_palliative'          |
| resuscitation               | dnacpr_l1             | 'palliative_care_team_review' |
| candidate for intubation    | dnacpr_level          | 'palliative_care_team_input'  |
| dnacpr status               | and_dnacpr            | 'to_hospice'                  |
| ceilings of treatment       | dnar_status           | 'nh_placement'                |
| escalation plans            | resus_dnar            | 'track_funding'               |
| cpr status                  | level_care            | 'escalation_of_care'          |
| escalation level            | dnar_as               | 'life_care'                   |
| eolc                        | community_dnr         | 'on_eol'                      |
| eol care                    | dnacpr_status         | 'end_of_life_care_at'         |
| comfort care                | cpr_status            | 'eol_medication'              |
| end of life care and        | previous_dnar         | 'hospice_placement'           |
| palliative medications      | eolc                  | 'refer_to_palliative_care'    |
| palliative input            | palliative_input      | 'palliative_approach'         |

|                                        |                       |                                |
|----------------------------------------|-----------------------|--------------------------------|
| hospice placement                      | re_dnar               | 'prn_palliative'               |
| eol medications                        | end_of_life_care      | 'transfer_to_st_christopher'   |
| eol meds                               | palliation            | 'hospice_referral'             |
| plan eol                               | eol_meds              | 'palliative_and'               |
| terminal care                          | eol_medications       | 'ceilings_of_treatment'        |
| palliation and                         | actively_dying        | 'end_of_life_care_medications' |
| 1 hour prn for agitation               | nh_resident           | 'dnr_not'                      |
| controlled drug 2 5                    | in_nh                 | 'nfr'                          |
| secretions liverpool care pathway      | background_dementia   | 'dnacpr'                       |
| to 5 mg subcutaneous                   | home_resident         | 'eolc_prn'                     |
| 1 to 2 mg                              | dementia_bedbound     | 'ceilings_of_care'             |
| liverpool care pathway verified        | bg_dementia           | 'escalation_plans'             |
| lactulose solution                     | dnar_level            | 'ceiling_of_treatment'         |
| 5 mg subcutaneous every                | family_updated        | 'continue_palliative'          |
| midazolam injection                    | resuscitation         | 'seen_by_palliative_team'      |
| morphine sulphate injection controlled | dnar_from             | 'eol_pathway'                  |
| every 1 hour prn                       | dols_in               | 'not_for_resuscitation'        |
| sulphate injection                     | advanced_dementia     | 'a_nursing_home_placement'     |
| prn for agitation                      | nfr_and               | 'end_of_life_care_i'           |
| control of upper respiratory tract     | dnar_but              | 'and_end_of_life_care'         |
| drug 2 5 to                            | dnar_cpr              | 'prn_medications'              |
| escalation to                          | not_for_icu           | 'palliative_management'        |
| or intubation                          | based_care            | 'keep_comfortable'             |
| dnar ward                              | and_escalation        | 'care_meds'                    |
| currently for full                     | dementia_dnar         | 'hospice_admission'            |
| plan dnar                              | alzheimers_dementia   | 'place_of_care'                |
| with icu                               | alzheimers            | 'st_christopher_s'             |
| not for hdu                            | palliative_management | 'care_funding'                 |
| beyond ward                            | palliation_and        | 'and_palliation'               |

|                             |                     |                              |
|-----------------------------|---------------------|------------------------------|
| maximal ward                | palliative_approach | 'best_supportive_care_and'   |
| ceiling of rx               | dnr_level           | 'a_palliative'               |
| in event of cardiac arrest  | 3_dnar              | 'that_palliative'            |
| not for inotropes           | escalation_level    | 'terminal_care'              |
| escalation or               | 1_dnar              | 'preferred_place_of_care_is' |
| ceiling of care             | dnacpr_with         | 'discharge_to_a_nursing'     |
| withdrawal of care          | with_dnar           | 'end_of_life_care_in'        |
| limit of care               | discussed_dnacpr    | 'community_palliative_care'  |
| limits of care              | about_resuscitation | 'chaplancy_support'          |
| palliative treatments only  | has_dnar            | 'chaplancy_referral'         |
| end of life care            | peace_document      | 'consider_hospice'           |
| liverpool care pathway      | nfr_not             | 'to_discuss_with_family'     |
| not for intubation          | based_management    | 'injectable_medications'     |
| not suitable for intubation | dnr_not             | 'anticipatory_medication'    |
